# Supplementary material for: Differential long-term bivalent HPV vaccine cross-protection by variants in the Costa Rica HPV vaccine trial
Source: PubMed Central journal article supplement (PMC11162434; doi:10.1038/s41541-024-00896-y), 2024-06-08
Supplement: 41541_2024_896_MOESM1_ESM.pdf [file 41541_2024_896_MOESM1_ESM.pdf]

**Supplementary Table 1.** Proportion of samples with sequencing results by HPV genotype and vaccination status.

| Characteristic | Overall                                  |                            | HPV-Vaccine Arm                          |                            | Combined HPV-Unvaccinated Group          |                            | HAV-Vaccine Arm                          |                            | UCG                                      |                            |
|----------------|------------------------------------------|----------------------------|------------------------------------------|----------------------------|------------------------------------------|----------------------------|------------------------------------------|----------------------------|------------------------------------------|----------------------------|
|                | Total samples tested (visit-level) n (%) | Samples with results n (%) | Total samples tested (visit-level) n (%) | Samples with results n (%) | Total samples tested (visit-level) n (%) | Samples with results n (%) | Total samples tested (visit-level) n (%) | Samples with results n (%) | Total samples tested (visit-level) n (%) | Samples with results n (%) |
| Total          | 860                                      | 544 (63.3)                 | 246                                      | 141 (57.3)                 | 614                                      | 403 (65.6)                 | 321                                      | 209 (65.1)                 | 293                                      | 194 (66.2)                 |
| Genotype       |                                          |                            |                                          |                            |                                          |                            |                                          |                            |                                          |                            |
| HPV 31         | 305 (35.5)                               | 180 (59.0)                 | 69 (28.0)                                | 28 (40.6)                  | 236 (38.4)                               | 152 (64.4)                 | 136 (42.4)                               | 88 (64.7)                  | 100 (34.1)                               | 64 (64.0)                  |
| HPV 33         | 132 (15.3)                               | 85 (64.4)                  | 54 (22.0)                                | 35 (64.8)                  | 78 (12.7)                                | 50 (64.1)                  | 47 (14.6)                                | 27 (57.4)                  | 31 (10.6)                                | 23 (74.2)                  |
| HPV 35         | 215 (25.0)                               | 147 (68.4)                 | 89 (36.2)                                | 61 (68.5)                  | 126 (20.5)                               | 86 (68.3)                  | 59 (18.4)                                | 39 (66.1)                  | 67 (22.9)                                | 47 (70.1)                  |
| HPV 45         | 208 (24.2)                               | 132 (63.5)                 | 34 (13.8)                                | 17 (50.0)                  | 174 (28.3)                               | 115 (66.1)                 | 79 (24.6)                                | 55 (69.6)                  | 95 (32.4)                                | 60 (63.2)                  |

HAV = hepatitis A virus, HPV = human papillomavirus, UCG = screening-only, observational unvaccinated control group.

Results from this table show that the proportion of sample results for each genotype do not qualitatively differ between vaccination groups.

**Supplementary Table 2.** Characteristics of women at year 4 (visit 48), by sequencing result status.

| <b>Characteristic</b>                                                                                      | <b>Inconclusive Results<br/>for All Tests</b> | <b>Had Results for All<br/>Tests</b> | <b>Some Had Results<br/>But Not All</b> |
|------------------------------------------------------------------------------------------------------------|-----------------------------------------------|--------------------------------------|-----------------------------------------|
| Total, N                                                                                                   | 243                                           | 458                                  | 56                                      |
| HPV vaccination status, n (%)                                                                              |                                               |                                      |                                         |
| HPV-vaccine arm                                                                                            | 83 (34.2)                                     | 119 (26.0)                           | 17 (30.4)                               |
| Combined HPV-unvaccinated group                                                                            | 160 (65.8)                                    | 339 (74.0)                           | 39 (69.6)                               |
| HAV-vaccine arm                                                                                            | 79 (32.5)                                     | 174 (38.0)                           | 24 (42.9)                               |
| UCG                                                                                                        | 81 (33.3)                                     | 165 (36.0)                           | 15 (26.8)                               |
| Age, years, n (%)                                                                                          |                                               |                                      |                                         |
| <26                                                                                                        | 118 (48.6)                                    | 241 (52.6)                           | 23 (41.1)                               |
| 26+                                                                                                        | 121 (49.8)                                    | 211 (46.1)                           | 30 (53.6)                               |
| No visit                                                                                                   | 4 (1.6)                                       | 6 (1.3)                              | 3 (5.4)                                 |
| Median, IQR (range)                                                                                        | 26, 24-28<br>(22-32)                          | 25, 24-27<br>(21-32)                 | 26, 24-28<br>(22-30)                    |
| HPV positivity, n (% <sup>a</sup> ; 95% CI)                                                                |                                               |                                      |                                         |
| HPV 16/18                                                                                                  | 24 (9.9; 6.6-14.1)                            | 33 (7.2; 5.1-9.9)                    | 7 (12.5; 5.6-23.2)                      |
| Other oncogenic HPV                                                                                        | 103 (42.4; 36.3-48.7)                         | 221 (48.3; 43.7-52.8)                | 34 (60.7; 47.5-72.8)                    |
| Non oncogenic HPV                                                                                          | 80 (32.9; 27.2-39.0)                          | 147 (32.1; 27.9-36.5)                | 19 (33.9; 22.5-47.0)                    |
| No HPV                                                                                                     | 83 (34.2; 28.4-40.3)                          | 157 (34.3; 30.0-38.7)                | 10 (17.9; 9.4-29.5)                     |
| No result                                                                                                  | 4 (1.6; 0.5-3.9)                              | 6 (1.3; 0.5-2.7)                     | 3 (5.4; 1.4-13.9)                       |
| Number of cross-protected type<br>31/33/35/45 infections for which the<br>woman joined the analysis, n (%) |                                               |                                      |                                         |
| 1                                                                                                          | 228 (93.8)                                    | 433 (94.5)                           | N/A                                     |
| 2                                                                                                          | 15 (6.2)                                      | 24 (5.2)                             | 50 (89.3)                               |
| 3                                                                                                          | 0 (0.0)                                       | 1 (0.2)                              | 6 (10.7)                                |

HAV = hepatitis A virus, HPV = human papillomavirus, IQR = interquartile range, N/A = not applicable; UCG = screening-only, observational unvaccinated control group.

<sup>a</sup> The sum of the percentages for HPV positivity does not equal 100 because women who had multiple HPV type infections were counted in multiple rows.

Results from this table suggest that characteristics of women do not qualitatively differ by sequencing result status.

**Supplementary Table 3. HPV positivity by vaccination status and sequencing result status.**

| HPV positivity<br>n (% <sup>a</sup> ; 95% CI) | No Results for All Tests |                                           |                         |                         | Had Results for All Tests |                                           |                          |                         | Some Had Results But Not All |                                           |                         |                        |
|-----------------------------------------------|--------------------------|-------------------------------------------|-------------------------|-------------------------|---------------------------|-------------------------------------------|--------------------------|-------------------------|------------------------------|-------------------------------------------|-------------------------|------------------------|
|                                               | HPV-<br>Vaccine Arm      | Combined<br>HPV-<br>Unvaccinated<br>Group | HAV-<br>Vaccine<br>Arm  | UCG                     | HPV-Vaccine<br>Arm        | Combined<br>HPV-<br>Unvaccinated<br>Group | HAV-<br>Vaccine<br>Arm   | UCG                     | HPV-<br>Vaccine<br>Arm       | Combined<br>HPV-<br>Unvaccinated<br>Group | HAV-<br>Vaccine<br>Arm  | UCG                    |
| Total, N                                      | 83                       | 160                                       | 79                      | 81                      | 119                       | 339                                       | 174                      | 165                     | 17                           | 39                                        | 24                      | 15                     |
| HPV 16/18                                     | 0 (0.0;<br>0.0-3.5)      | 24 (15.0;<br>10.1-21.2)                   | 13 (16.5;<br>9.5-25.9)  | 11 (13.6;<br>7.4-22.4)  | 2 (1.7;<br>0.3-5.4)       | 31 (9.1;<br>6.4-12.6)                     | 18 (10.3;<br>6.4-15.6)   | 13 (7.9;<br>4.5-12.8)   | 1 (5.9;<br>0.3-25.8)         | 6 (15.4;<br>6.5-29.3)                     | 6 (25.0;<br>10.8-44.9)  | 0 (0.0;<br>0.0-18.1)   |
| Other oncogenic HPV                           | 45 (54.2;<br>43.4-64.7)  | 58 (36.3;<br>29.1-43.9)                   | 40 (50.6;<br>39.7-61.5) | 18 (22.2;<br>14.2-32.2) | 56 (47.1;<br>38.2-56.0)   | 165 (48.7;<br>43.4-54.0)                  | 125 (71.8;<br>64.8-78.1) | 40 (24.2;<br>18.2-31.2) | 11 (64.7;<br>40.5-84.3)      | 23 (59.0;<br>43.2-73.5)                   | 20 (83.3;<br>64.5-94.5) | 3 (20.0;<br>5.4-45.3)  |
| Non-oncogenic HPV                             | 32 (38.6;<br>28.6-49.3)  | 48 (30.0;<br>23.3-37.4)                   | 30 (38.0;<br>27.8-49.0) | 18 (22.2;<br>14.2-32.2) | 46 (38.7;<br>30.2-47.6)   | 101 (29.8;<br>25.1-34.8)                  | 61 (35.1;<br>28.2-42.4)  | 40 (24.2;<br>18.2-31.2) | 5 (29.4;<br>11.7-53.7)       | 14 (35.9;<br>22.1-51.7)                   | 9 (37.5;<br>20.1-57.8)  | 5 (33.3;<br>13.4-59.2) |
| No HPV                                        | 22 (26.5;<br>17.9-36.8)  | 61 (38.1;<br>30.8-45.8)                   | 20 (25.3;<br>16.7-35.8) | 41 (50.6;<br>39.8-61.4) | 44 (37.0;<br>28.7-45.9)   | 113 (33.3;<br>28.5-38.5)                  | 18 (10.3;<br>6.4-15.6)   | 95 (57.6;<br>49.9-65.0) | 2 (11.8;<br>2.0-33.7)        | 8 (20.5;<br>10.0-35.3)                    | 1 (4.2;<br>0.2-18.9)    | 7 (46.7;<br>23.2-71.3) |
| No result                                     | 2 (2.4;<br>0.4-7.7)      | 2 (1.3;<br>0.2-4.1)                       | 2 (2.5;<br>0.4-8.1)     | 0 (0.0;<br>0.0-3.6)     | 0 (0.0;<br>0.0-2.5)       | 6 (1.8;<br>0.7-3.6)                       | 6 (3.4;<br>1.4-7.0)      | 0 (0.0;<br>0.0-1.8)     | 1 (5.9;<br>0.3-25.8)         | 2 (5.1;<br>0.9-15.9)                      | 2 (8.3;<br>1.4-24.9)    | 0 (0.0;<br>0.0-18.1)   |

CI = confidence interval, HAV = hepatitis A virus, HPV = human papillomavirus, IQR = interquartile range, UCG = screening-only, observational unvaccinated control group.

<sup>a</sup> The sum of the percentages for HPV positivity does not equal 100 because women who had multiple type infections were counted in multiple rows.

Results from this table suggest that HPV positivity by vaccination status and sequencing result status do not qualitatively differ. Given the exploratory nature of this investigation into possible selection bias by testing status, we did not adjust for multiple comparisons.

**Supplementary Table 4.** L1 boundary positions and proportion of polymorphisms by HPV type.

| <b>HPV Type</b> | <b>L1 Lower Bound</b> | <b>L1 Upper Bound</b> | <b>Nucleotides with Variability<sup>a</sup><br/>n (%)</b> |
|-----------------|-----------------------|-----------------------|-----------------------------------------------------------|
| HPV 31          | 5552                  | 7066                  | 42 (2.8)                                                  |
| HPV 33          | 5594                  | 7093                  | 25 (1.7)                                                  |
| HPV 35          | 5601                  | 7109                  | 26 (1.7)                                                  |
| HPV 45          | 5608                  | 7149                  | 35 (2.3)                                                  |

HPV = human papillomavirus.

<sup>a</sup> Polymorphism observed in at least two samples.

**Supplementary Table 5.** Significant SNPs in the L1 gene region of HPV 31/33/35/45 <sup>a</sup> that had variability in at least two samples.

| <b>Position</b> | <b>Minor Allele</b> | <b>Minor Allele Frequency</b> | <b>Number of Observations</b> | <b>Nucleotide A</b> | <b>Nucleotide T</b> | <b>Nucleotide C</b> | <b>Nucleotide G</b> | <b>Odds Ratio <sup>b</sup> (95% CI)</b> | <b>P-value</b> |
|-----------------|---------------------|-------------------------------|-------------------------------|---------------------|---------------------|---------------------|---------------------|-----------------------------------------|----------------|
| HPV 31          |                     |                               |                               |                     |                     |                     |                     |                                         |                |
| 5921            | T                   | 0.24                          | 179                           | 0                   | 43                  | 136                 | 0                   | 0.21 (0.05-0.91)                        | 0.04           |
| 6127            | G                   | 0.22                          | 179                           | 139                 | 0                   | 0                   | 40                  | 2.72 (1.15-6.43)                        | 0.02           |
| 6238            | A                   | 0.22                          | 177                           | 39                  | 138                 | 0                   | 0                   | 2.80 (1.18-6.63)                        | 0.02           |
| 6367            | C                   | 0.23                          | 177                           | 0                   | 136                 | 41                  | 0                   | 0.22 (0.05-0.96)                        | 0.04           |
| 6372            | C                   | 0.24                          | 177                           | 135                 | 0                   | 42                  | 0                   | 0.21 (0.05-0.92)                        | 0.04           |
| 6379            | G                   | 0.16                          | 179                           | 150                 | 0                   | 0                   | 29                  | 3.10 (1.23-7.80)                        | 0.02           |
| 6772            | A                   | 0.21                          | 180                           | 38                  | 0                   | 0                   | 142                 | 3.00 (1.26-7.11)                        | 0.01           |
| 6796            | G                   | 0.24                          | 180                           | 137                 | 0                   | 0                   | 43                  | 0.21 (0.05-0.92)                        | 0.04           |
| 6862            | T                   | 0.16                          | 180                           | 0                   | 28                  | 152                 | 0                   | 3.32 (1.31-8.38)                        | 0.01           |
| HPV 35          |                     |                               |                               |                     |                     |                     |                     |                                         |                |
| 5939            | G                   | 0.23                          | 145                           | 112                 | 0                   | 0                   | 33                  | 0.37 (0.15-0.89)                        | 0.03           |

CI = confidence interval; HPV = human papillomavirus; SNP = single nucleotide polymorphism.

<sup>a</sup> SNPs in the L1 gene region were assessed for HPV 31, 33, 35, and 45, but significant SNPs were only identified for HPV 31 and 35.

<sup>b</sup> The odds ratios compare allele frequencies at each nucleotide position between HPV-vaccinated and HPV-unvaccinated women using the most common nucleotide at each position as the referent group; thus, the interpretation is the odds of having the minor allele at the specific nucleotide position in HPV-vaccinated women compared to the odds among HPV-unvaccinated women.

**Supplementary Table 6.** Comparison of vaccine efficacy during the randomized trial phase and the observational long-term follow-up phase, by variant.

|                   | Randomized Trial Phase |                  |                 |                   |                      | Observational Long-Term Follow-Up Phase |                  |      |                   |                      | p-value <sup>a</sup> |
|-------------------|------------------------|------------------|-----------------|-------------------|----------------------|-----------------------------------------|------------------|------|-------------------|----------------------|----------------------|
|                   | HPV-Vaccine Arm        |                  | HAV-Vaccine Arm |                   | VE (95% CI)          | HPV-Vaccine Arm                         |                  | UCG  |                   | VE (95% CI)          |                      |
|                   | n                      | Rate (95% CI)    | n               | Rate (95% CI)     |                      | n                                       | Rate (95% CI)    | n    | Rate (95% CI)     |                      |                      |
| HPV 31 (Total N)  | 2665                   |                  | 2637            |                   |                      | 2163                                    |                  | 2382 |                   |                      |                      |
| Overall           | 13                     | 4.9 (2.7, 8.1)   | 88              | 33.4 (27.0, 40.8) | 85.4 (74.5, 92.1)    | 15                                      | 6.9 (4.0, 11.2)  | 64   | 26.9 (20.9, 34.0) | 74.2 (55.6, 85.7)    | 0.21                 |
| HPV 31 Lineage A  | 0                      | 0.0 (0.0, 1.1)   | 26              | 9.9 (6.6, 14.2)   | 100.0 (87.9, 100.0)  | 2                                       | 0.9 (0.2, 3.1)   | 15   | 6.3 (3.7, 10.1)   | 85.3 (43.9, 97.7)    | 0.30                 |
| HPV 31 Lineage B  | 7                      | 2.6 (1.1, 5.2)   | 19              | 7.2 (4.5, 11.0)   | 63.5 (15.2, 85.7)    | 4                                       | 1.8 (0.6, 4.5)   | 10   | 4.2 (2.1, 7.5)    | 56.0 (-37.1, 88.0)   | 0.84                 |
| HPV 31 Lineage C  | 6                      | 2.3 (0.9, 4.7)   | 43              | 16.3 (12.0, 21.7) | 86.2 (69.2, 94.7)    | 9                                       | 4.2 (2.0, 7.6)   | 39   | 16.4 (11.8, 22.1) | 74.6 (49.1, 88.4)    | 0.33                 |
| 5921 = T          | 0                      | 0.0 (0.0, 1.1)   | 26              | 9.9 (6.6, 14.2)   | 100.0 (87.9, 100.0)  | 2                                       | 0.9 (0.2, 3.1)   | 15   | 6.3 (3.7, 10.1)   | 85.3 (43.9, 97.7)    | 0.30                 |
| 5921 = C          | 13                     | 4.9 (2.7, 8.1)   | 61              | 23.1 (17.9, 29.4) | 78.9 (62.5, 88.8)    | 13                                      | 6.0 (3.3, 10.0)  | 49   | 20.6 (15.4, 26.9) | 70.8 (47.2, 84.7)    | 0.49                 |
| 6127 = A          | 6                      | 2.3 (0.9, 4.7)   | 68              | 25.8 (20.2, 32.4) | 91.3 (81.0, 96.6)    | 11                                      | 5.1 (2.7, 8.8)   | 53   | 22.3 (16.9, 28.8) | 77.1 (57.4, 88.6)    | 0.11                 |
| 6127 = G          | 7                      | 2.6 (1.1, 5.2)   | 20              | 7.6 (4.8, 11.5)   | 65.4 (20.1, 86.4)    | 4                                       | 1.8 (0.6, 4.5)   | 10   | 4.2 (2.1, 7.5)    | 56.0 (-37.1, 88.0)   | 0.79                 |
| 6238 = T          | 6                      | 2.3 (0.9, 4.7)   | 68              | 25.8 (20.2, 32.4) | 91.3 (81.0, 96.6)    | 11                                      | 5.1 (2.7, 8.8)   | 53   | 22.3 (16.9, 28.8) | 77.1 (57.4, 88.6)    | 0.11                 |
| 6238 = A          | 7                      | 2.6 (1.1, 5.2)   | 18              | 6.8 (4.2, 10.6)   | 61.5 (9.8, 85.0)     | 4                                       | 1.8 (0.6, 4.5)   | 10   | 4.2 (2.1, 7.5)    | 56.0 (-37.1, 88.0)   | 0.88                 |
| 6367 = C          | 0                      | 0.0 (0.0, 1.1)   | 26              | 9.9 (6.6, 14.2)   | 100.0 (87.9, 100.0)  | 2                                       | 0.9 (0.2, 3.1)   | 13   | 5.5 (3.0, 9.1)    | 83.1 (33.9, 97.4)    | 0.30                 |
| 6367 = T          | 13                     | 4.9 (2.7, 8.1)   | 60              | 22.8 (17.6, 29.0) | 78.6 (61.8, 88.7)    | 13                                      | 6.0 (3.3, 10.0)  | 50   | 21.0 (15.8, 27.4) | 71.4 (48.3, 85.0)    | 0.53                 |
| 6372 = C          | 0                      | 0.0 (0.0, 1.1)   | 26              | 9.9 (6.6, 14.2)   | 100.0 (87.9, 100.0)  | 2                                       | 0.9 (0.2, 3.1)   | 14   | 5.9 (3.3, 9.6)    | 84.3 (39.3, 97.6)    | 0.30                 |
| 6372 = A          | 13                     | 4.9 (2.7, 8.1)   | 60              | 22.8 (17.6, 29.0) | 78.6 (61.8, 88.7)    | 13                                      | 6.0 (3.3, 10.0)  | 49   | 20.6 (15.4, 26.9) | 70.8 (47.2, 84.7)    | 0.51                 |
| 6379 = A          | 7                      | 2.6 (1.1, 5.2)   | 73              | 27.7 (21.9, 34.5) | 90.5 (80.4, 96.0)    | 12                                      | 5.5 (3.0, 9.4)   | 57   | 23.9 (18.3, 30.7) | 76.8 (57.8, 88.1)    | 0.11                 |
| 6379 = G          | 6                      | 2.3 (0.9, 4.7)   | 14              | 5.3 (3.0, 8.7)    | 57.6 (-8.4, 85.0)    | 3                                       | 1.4 (0.4, 3.8)   | 7    | 2.9 (1.3, 5.8)    | 52.8 (-79.6, 90.1)   | 0.92                 |
| 6772 = G          | 6                      | 2.3 (0.9, 4.7)   | 70              | 26.5 (20.9, 33.2) | 91.5 (81.6, 96.7)    | 11                                      | 5.1 (2.7, 8.8)   | 54   | 22.7 (17.2, 29.3) | 77.6 (58.2, 88.8)    | 0.11                 |
| 6772 = A          | 7                      | 2.6 (1.1, 5.2)   | 18              | 6.8 (4.2, 10.6)   | 61.5 (9.8, 85.0)     | 4                                       | 1.8 (0.6, 4.5)   | 10   | 4.2 (2.1, 7.5)    | 56.0 (-37.1, 88.0)   | 0.88                 |
| 6796 = G          | 0                      | 0.0 (0.0, 1.1)   | 26              | 9.9 (6.6, 14.2)   | 100.0 (87.9, 100.0)  | 2                                       | 0.9 (0.2, 3.1)   | 15   | 6.3 (3.7, 10.1)   | 85.3 (43.9, 97.7)    | 0.30                 |
| 6796 = A          | 13                     | 4.9 (2.7, 8.1)   | 62              | 23.5 (18.2, 29.8) | 79.3 (63.1, 89.0)    | 13                                      | 6.0 (3.3, 10.0)  | 49   | 20.6 (15.4, 26.9) | 70.8 (47.2, 84.7)    | 0.47                 |
| 6862 = C          | 7                      | 2.6 (1.1, 5.2)   | 74              | 28.1 (22.3, 34.9) | 90.6 (80.7, 96.0)    | 12                                      | 5.5 (3.0, 9.4)   | 58   | 24.3 (18.7, 31.1) | 77.2 (58.6, 88.3)    | 0.12                 |
| 6862 = T          | 6                      | 2.3 (0.9, 4.7)   | 14              | 5.3 (3.0, 8.7)    | 57.6 (-8.4, 85.0)    | 3                                       | 1.4 (0.4, 3.8)   | 6    | 2.5 (1.0, 5.2)    | 44.9 (-121.2, 88.8)  | 0.83                 |
| HPV 33 (Total N)  | 2775                   |                  | 2810            |                   |                      | 2192                                    |                  | 2500 |                   |                      |                      |
| Overall           | 13                     | 4.7 (2.6, 7.8)   | 27              | 9.6 (6.5, 13.8)   | 51.2 (6.4, 75.6)     | 22                                      | 10.0 (6.5, 14.9) | 23   | 9.2 (6.0, 13.6)   | -9.1 (-97.0, 39.7)   | 0.12                 |
| HPV 33 Lineage A  | 11                     | 4.0 (2.1, 6.9)   | 24              | 8.5 (5.6, 12.5)   | 53.6 (6.3, 78.1)     | 22                                      | 10.0 (6.5, 14.9) | 20   | 8.0 (5.0, 12.1)   | -25.5 (-132.3, 31.9) | 0.08                 |
| HPV 33 Lineage B  | 2                      | 0.7 (0.1, 2.4)   | 3               | 1.1 (0.3, 2.9)    | 32.5 (-354.0, 92.0)  | 0                                       | 0.0 (0.0, 1.4)   | 3    | 1.2 (0.3, 3.3)    | 100.0 (-95.5, 100.0) | 0.59                 |
| HPV 35 (Total N)  | 2757                   |                  | 2779            |                   |                      | 2182                                    |                  | 2489 |                   |                      |                      |
| Overall           | 31                     | 11.2 (7.8, 15.7) | 39              | 14.0 (10.1, 18.9) | 19.9 (-28.5, 50.4)   | 30                                      | 13.7 (9.5, 19.3) | 47   | 18.9 (14.1, 24.8) | 27.2 (-14.8, 54.4)   | 0.78                 |
| HPV 35 Lineage A1 | 30                     | 10.9 (7.5, 15.3) | 38              | 13.7 (9.8, 18.5)  | 20.4 (-28.5, 51.1)   | 27                                      | 12.4 (8.3, 17.7) | 44   | 17.7 (13.0, 23.4) | 30.0 (-12.7, 57.1)   | 0.72                 |
| HPV 35 Lineage A2 | 1                      | 0.4 (0.0, 1.8)   | 1               | 0.4 (0.0, 1.8)    | -0.8 (-3831.1, 97.4) | 3                                       | 1.4 (0.3, 3.7)   | 3    | 1.2 (0.3, 3.3)    | -14.1 (-563.9, 80.4) | 0.99                 |
| 5939 = G          | 3                      | 1.1 (0.3, 3.0)   | 9               | 3.2 (1.6, 5.9)    | 66.4 (-18.9, 92.7)   | 5                                       | 2.3 (0.8, 5.1)   | 16   | 6.4 (3.8, 10.2)   | 64.4 (6.1, 88.3)     | 0.95                 |
| 5939 = A          | 28                     | 10.2 (6.9, 14.4) | 30              | 10.8 (7.4, 15.2)  | 5.9 (-58.1, 44.1)    | 24                                      | 11.0 (7.2, 16.1) | 30   | 12.1 (8.3, 16.9)  | 8.7 (-56.4, 47.2)    | 0.94                 |
| HPV 45 (Total N)  | 2747                   |                  | 2746            |                   |                      | 2194                                    |                  | 2461 |                   |                      |                      |
| Overall           | 11                     | 4.0 (2.1, 6.9)   | 55              | 20.0 (15.3, 25.8) | 80.0 (62.8, 90.0)    | 6                                       | 2.7 (1.1, 5.7)   | 60   | 24.4 (18.8, 31.1) | 88.8 (75.5, 95.6)    | 0.31                 |
| HPV 45 Lineage A  | 6                      | 2.2 (0.9, 4.5)   | 27              | 9.8 (6.6, 14.1)   | 77.8 (48.4, 91.6)    | 4                                       | 1.8 (0.6, 4.4)   | 32   | 13.0 (9.1, 18.1)  | 86.0 (63.3, 95.8)    | 0.55                 |
| HPV 45 Lineage B  | 5                      | 1.8 (0.7, 4.0)   | 28              | 10.2 (6.9, 14.5)  | 82.1 (56.3, 93.9)    | 2                                       | 0.9 (0.2, 3.0)   | 28   | 11.4 (7.7, 16.2)  | 92.0 (71.4, 98.7)    | 0.41                 |

CI = confidence interval; HAV = hepatitis A virus; HPV = human papillomavirus; UCG = screening-only, observational unvaccinated control group; VE = vaccine efficacy.

<sup>a</sup> The p-value represents a test for heterogeneity between the vaccine efficacy in the randomized trial phase compared to the vaccine efficacy in the observational long-term follow-up phase.

**Supplementary Table 7.** Comparison of follow-up time and testing between women included in the analysis from the randomized control trial phase and the long-term follow-up phase.

|                     | Randomized Control Trial Phase |                  | Long-Term Follow-Up Phase |                  |
|---------------------|--------------------------------|------------------|---------------------------|------------------|
|                     | HPV-Vaccine Arm                | HAV-Vaccine Arm  | HPV-Vaccine Arm           | UCG              |
| Total women (N)     | 2846                           | 2909             | 2222 <sup>a</sup>         | 2556             |
| Months of follow up |                                |                  |                           |                  |
| Median (IQR)        | 20.5 (17.6-23.5)               | 20.5 (17.8-23.5) | 52.7 (46.8-60.4)          | 49.6 (42.4-56.1) |
| Mean (SD)           | 20.97 (6.13)                   | 21.22 (6.28)     | 52.09 (13.44)             | 49.09 (13.29)    |
| Number of PCR tests |                                |                  |                           |                  |
| Median (IQR)        | 2 (2-2)                        | 2 (2-3)          | 2 (2-3)                   | 2 (2-3)          |
| Mean (SD)           | 2.28 (0.82)                    | 2.33 (0.85)      | 2.63 (1.68)               | 2.93 (1.97)      |

HAV = hepatitis A virus; HPV = human papillomavirus; IQR = interquartile range; PCR = polymerase chain reaction; SD = standard deviation; UCG = screening-only, observational unvaccinated control group.

<sup>a</sup> The HPV arm in the long-term follow-up phase is smaller than the HPV arm in the randomized control trial phase due to women who were either lost to follow-up or not invited to participate in the long-term follow-up phase.
